# Supplementary figures and images for: Recombinant Goose Circoviruses Circulating in Domesticated and Wild Geese in Poland
Source: MDPI journal article supplement (doi:10.3390/v10030107), 2018-03-02

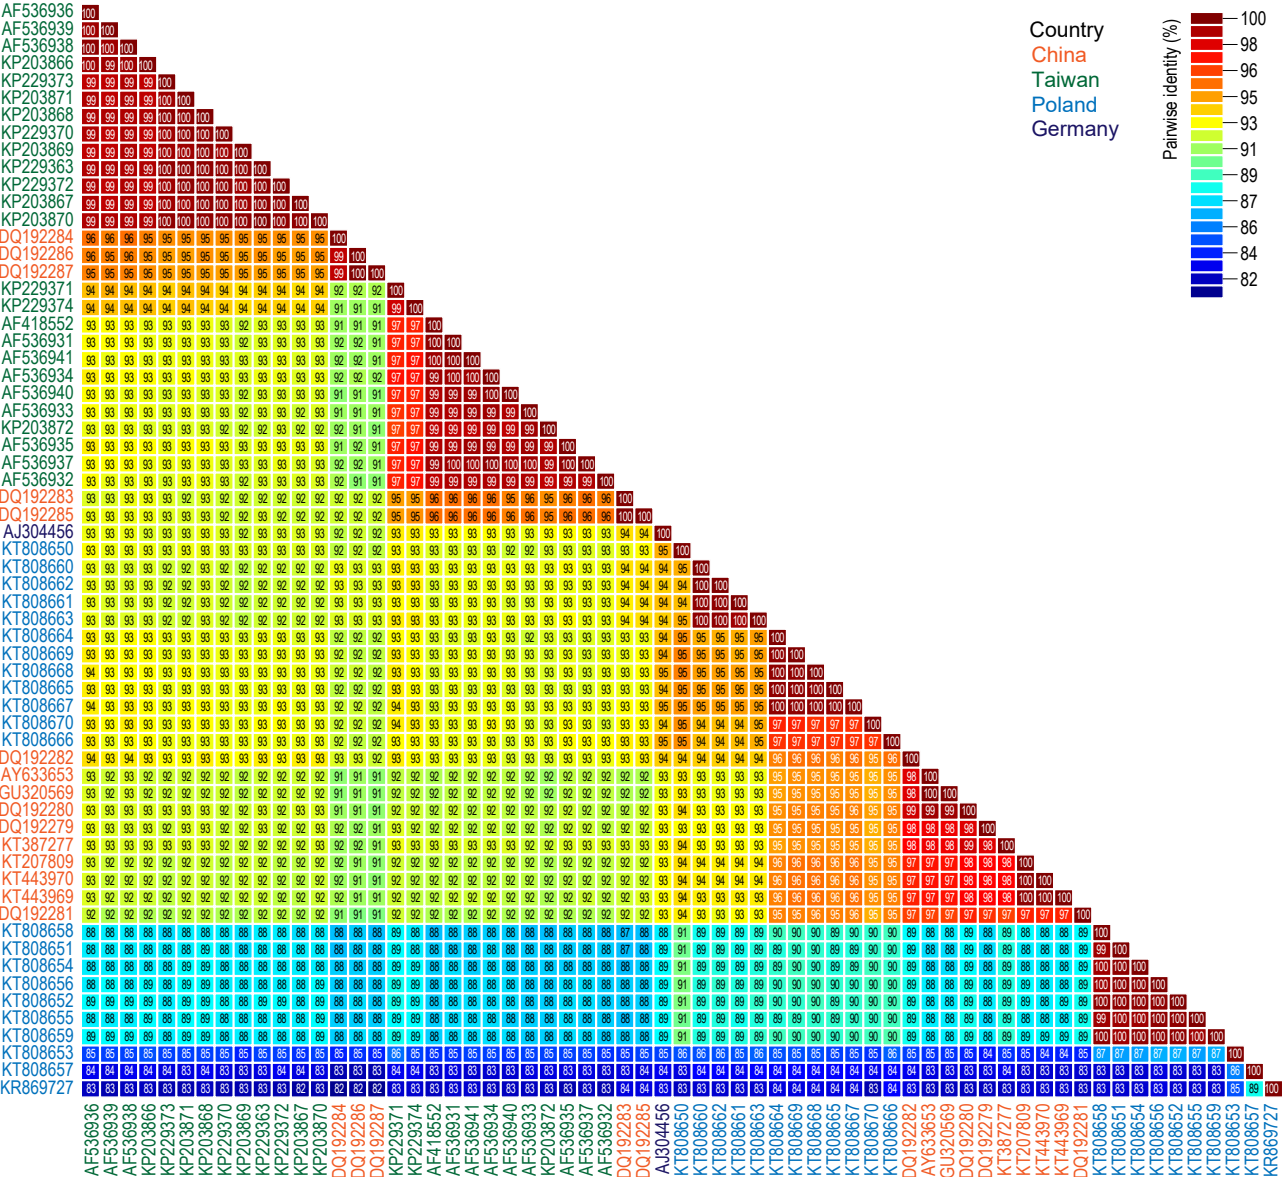

Supplement: s1 [file s1]
